# Supplementary material for: A simple, fast, and sensitive colorimetric assay for visual detection of berberine in human plasma by NaHSO4-optimized gold nanoparticles
Source: Royal Society of Chemistry journal article supplement (doi:10.1039/c7ra05291j), 2017-01-01
Supplement: c7ra05291j1.pdf [file c7ra05291j1.pdf]

# 1 **Electronic Supplementary Information**

## 2 **A Simple, Fast, and Sensitive Colorimetric Assay for Visual** 3 **Detection of Berberine in Human Plasma by NaHSO<sub>4</sub>** 4 **Optimized Gold Nanoparticles**

5 Ziwei Hu,<sup>†,#</sup> Mingshan Xie,<sup>†,#</sup> Danting Yang,<sup>‡</sup> Dong Chen,<sup>§</sup> Jingyi Jian,<sup>†</sup> Haibin Li,<sup>†</sup> Kaisong  
6 Yuan,<sup>†</sup> Zhengjin Jiang <sup>\*,†</sup> and Haibo Zhou<sup>\*,†</sup>

7 <sup>†</sup> Institute of Pharmaceutical Analysis, College of Pharmacy, Jinan University, Guangzhou, Guangdong  
8 510632, China

9 <sup>‡</sup> Department of Preventative Medicine, Zhejiang Provincial Key Laboratory of Pathological and  
10 Physiological Technology, Medical School of Ningbo University, Ningbo, Zhejiang 315211, China

11 <sup>§</sup> Department of Urology, Sun Yat-sen University Cancer Center, Guangzhou, Guangdong 510060,  
12 China

13

14

15

16

17 **Limit of Detection (LOD) Measurements.** The LOD was calculated using the below  
18 equation:  $LOD = 3SD/S$ . Where "SD" is the standard deviation of the blank, "S" is the  
19 slope of the calibration curve ( $Y = 0.0609X + 0.0056$ ). Herein the SD is 0.001308, so  
20 the LOD is 0.06  $\mu\text{g/mL}$ .

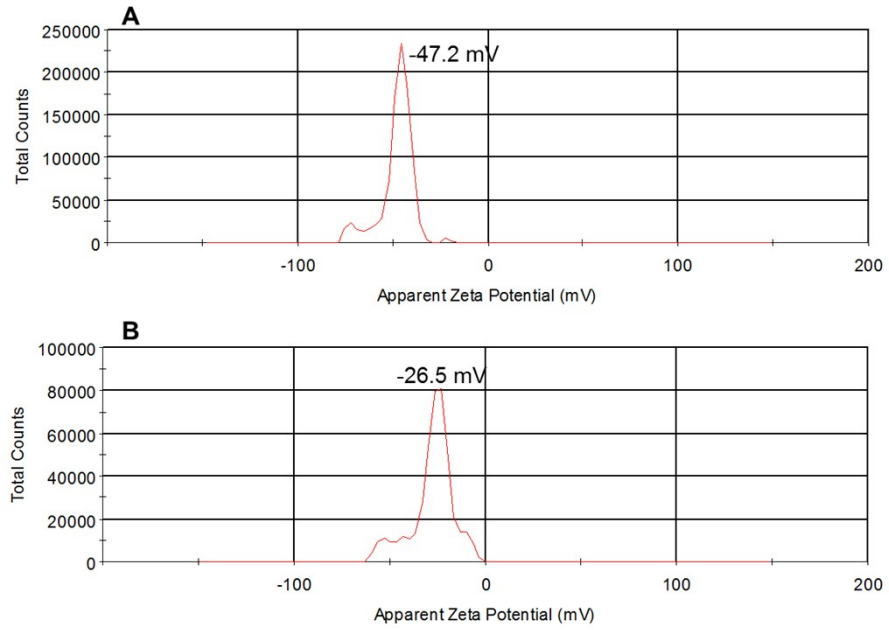

1  
2 Figure S1. Zeta potential of AuNPs (A) before and (B) after the addition of 5  $\mu\text{M}$  berberine.  
3

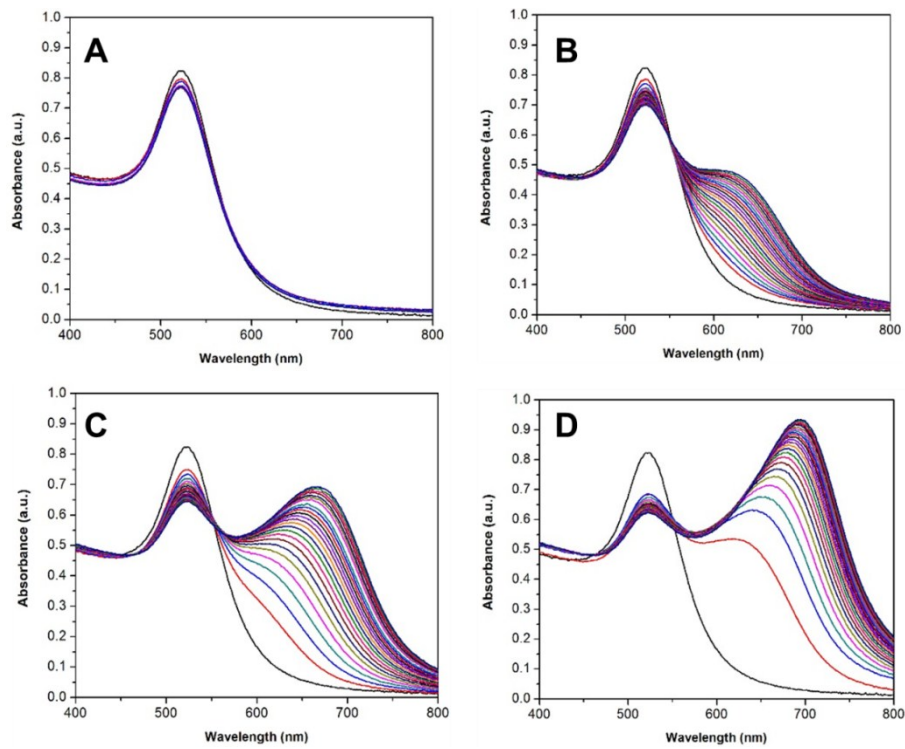

4  
5 Figure S2. Time course of the aggregation of AuNPs as induced by (A) 1.0  $\mu\text{M}$ , (B) 2.0  $\mu\text{M}$ ,  
6 (C) 2.5  $\mu\text{M}$  and (D) 3.0  $\mu\text{M}$  of berberine monitored with UV-vis absorbance spectra at an  
7 interval of 2.5 min.
